# Supplementary material for: Traffic-Related Air Pollution and Childhood Asthma: Recent Advances and Remaining Gaps in the Exposure Assessment Methods
Source: MDPI journal article supplement (doi:10.3390/ijerph14030312), 2017-03-17
Supplement: s1 [file s1]

Table S1 Exposure assessment place, time and validation in the Included Studies

| Exposure assessment method | Study reference           | Exposure assessment place                                                                                       | Exposure assessment time                     | Exposure assessment validation |
|----------------------------|---------------------------|-----------------------------------------------------------------------------------------------------------------|----------------------------------------------|--------------------------------|
| TRAP surrogates            | Clark et al. (2010)       | Residential address<br>( <b>considering moving residence</b> )                                                  | Pregnancy and birth year                     | No validation                  |
|                            | Dell et al. (2014)        | Residential address                                                                                             | Birth year and current (year of recruitment) | No validation                  |
|                            | English et al. (1999)     | Residential address within buffer region                                                                        | Current (year of recruitment)                | No validation                  |
|                            | Hasunuma et al. (2016)    | UAt home. At school for part of the population and considering mobility                                         | At 1.5 years                                 | No validation                  |
|                            | Krämer et al. (2009)      | Residential address<br>( <b>considering moving residence</b> )                                                  | Birth year                                   | No validation                  |
|                            | Lindgren et al. (2013)    | Residential address<br>( <b>additional analysis with children censored when/if moving during time at risk</b> ) | Birth year                                   | No validation                  |
|                            | McConnell et al. (2010)   | Residential and school addresses                                                                                | Year of recruitment                          | No validation                  |
|                            | Mölter et al. (2014b)     | Residential address at birth, 4-5 years and at 8-10 years                                                       | Birth year<br>At 4-5 y.o.<br>At 8-10 y.o.    | No validation                  |
|                            | Morgenstern et al. (2007) | Residential address                                                                                             | Birth year                                   | No validation                  |

|                                |                           |                                                                                      |                                                                                                                                                                            |               |
|--------------------------------|---------------------------|--------------------------------------------------------------------------------------|----------------------------------------------------------------------------------------------------------------------------------------------------------------------------|---------------|
|                                | Morgenstern et al. (2008) | Residential address                                                                  | Birth year                                                                                                                                                                 | No validation |
|                                | Oftedal et al. (2009)     | Residential address                                                                  | Birth year                                                                                                                                                                 | No validation |
|                                | Patel et al. (2011)       | Residential address<br><b>(additional analysis for non-movers)</b>                   | At 1 y.o.<br>At 2 y.o.<br>At 3 y.o.                                                                                                                                        | No validation |
|                                | Ranzi et al. (2014)       | Residential address                                                                  | Birth year                                                                                                                                                                 | No validation |
|                                | Shima et al. (2003)       | Residential address                                                                  | Year of recruitment                                                                                                                                                        | No validation |
|                                | Yamazaki et al. (2014)    | Houses and schools                                                                   | Unclear                                                                                                                                                                    | No validation |
|                                | Zmirou et al. (2004)      | Residential and daycare or school addresses<br><b>(considering moving residence)</b> | Before the age of 3 y.o.<br>Lifelong                                                                                                                                       | No validation |
| Fixed-site monitoring stations | Clark et al. (2010)       | Residential address<br><b>(considering moving residence)</b>                         | Pregnancy and birth year                                                                                                                                                   | No validation |
|                                | Dell et al. (2014)        | Residential address                                                                  | Birth year, current (year of recruitment) and cumulative                                                                                                                   | No validation |
|                                | Deng et al. (2015)        | Kindergarten address<br><b>(additional analysis for non-movers)</b>                  | Pregnancy and birth year                                                                                                                                                   | No validation |
|                                | Deng et al. (2016)        | Kindergarten address                                                                 | Pre-conceptional (exposure during 1 year before conception), pre-natal (exposure during the whole pregnancy), and post-natal exposure (exposure from birth to the current) | No validation |

|                            |                         |                                                                                                                  |                                                                                                                                  |                                                                                        |
|----------------------------|-------------------------|------------------------------------------------------------------------------------------------------------------|----------------------------------------------------------------------------------------------------------------------------------|----------------------------------------------------------------------------------------|
|                            | Kim et al. (2016)       | Residential address                                                                                              | Birth year and the year preceding the questionnaire survey                                                                       | No validation                                                                          |
|                            | Liu et al. (2016)       | Residential address                                                                                              | Pregnancy year, first year, first two years, first three years, and total years since birth (from birth day to the surveyed day) | No validation                                                                          |
|                            | McConnell et al. (2010) | Residential area/district                                                                                        | The 2003 average ambient concentrations were assigned to all children in the community (exposure at the recruitment)             | No validation                                                                          |
|                            | Nishimura et al. (2013) | Residential address<br><b>(considering moving residence)</b>                                                     | Birth year and first 3 years of life                                                                                             | No validation                                                                          |
|                            | Shima and Adachi (2000) | School area/district                                                                                             | 3 years' average (1991-1993) before/at recruitment (in 1992)                                                                     | No validation                                                                          |
|                            | Shima et al. (2002)     | School area/district<br><b>(children had to live at their address 3 years prior to entering the first grade)</b> | 10 years' average (1988-1997)                                                                                                    | No validation                                                                          |
|                            | Wang et al. (2016)      | Residential address                                                                                              | Long-term cumulative exposure from birth until end of the study                                                                  | No validation                                                                          |
| Land-use regression models | Brauer et al. (2002)    | Residential address<br><b>(additional analysis for non-movers)</b>                                               | Birth address (long-term exposure)                                                                                               | BC, $R^2 = 81\%$<br>NO <sub>2</sub> , $R^2 = 85\%$<br>PM <sub>2.5</sub> , $R^2 = 73\%$ |
|                            | Brauer et al. (2007)    | Residential address                                                                                              | Birth address (long-term exposure)                                                                                               | As above                                                                               |
|                            | Gehring et al. (2010)   | Residential address<br><b>(additional analysis for non-movers)</b>                                               | Birth address (long-term exposure)                                                                                               | As above                                                                               |

|                        |                                                                                                                                         |                                                                                        |                                                                                                                                 |
|------------------------|-----------------------------------------------------------------------------------------------------------------------------------------|----------------------------------------------------------------------------------------|---------------------------------------------------------------------------------------------------------------------------------|
| Brunst et al. (2015)   | Addresses of all locations where the child spent 8 or more hours in an average week (e.g., home, daycare, relative's home, school etc.) | Time-weighted average (birth, birth-1, 1-2, 2-3, 3-4, 6-7, birth-4, 4-6, birth-7 y.o.) | EC, $R^2 = 75\%$                                                                                                                |
| Carlsten et al. (2010) | Residential address                                                                                                                     | Birth year                                                                             | BC, $R^2 = 39\% - 41\%$<br>NO, $R^2 = 57\% - 62\%$<br>NO <sub>2</sub> , $R^2 = 56\% - 60\%$<br>PM <sub>2.5</sub> , $R^2 = 52\%$ |
| Clark et al. (2010)    | Residential address<br>( <b>considering moving residence</b> )                                                                          | Pregnancy and birth year                                                               | As above                                                                                                                        |
| Dell et al. (2014)     | Residential address, daycare and school                                                                                                 | Birth year, current (year of recruitment) and cumulative                               | NO <sub>2</sub> , $R^2 = 69\%$                                                                                                  |
| Fuertes et al. (2013)  | Residential address                                                                                                                     | Birth year, at 6 y.o. and 10 y.o.                                                      | BC, $R^2 = 91\% - 97\%$<br>NO <sub>2</sub> , $R^2 = 81\% - 89\%$<br>PM <sub>2.5</sub> , $R^2 = 55\% - 88\%$                     |
| Gehring et al. (2002)  | Residential address                                                                                                                     | Birth address (annual average)                                                         | BC, $R^2 = 67\%$<br>NO <sub>2</sub> , $R^2 = 62\%$<br>PM <sub>2.5</sub> , $R^2 = 56\%$                                          |
| Gehring et al. (2015a) | Residential address                                                                                                                     | "long-term" at the birth and current address                                           | BC, $R^2 = 89\%$<br>NO <sub>2</sub> , $R^2 = 81\%$<br>PM <sub>2.5</sub> , $R^2 = 61\%$                                          |

|  |                        |                     |                                                            |                                                                                                                                                                                                                                                                                                                                                                                                                                                            |
|--|------------------------|---------------------|------------------------------------------------------------|------------------------------------------------------------------------------------------------------------------------------------------------------------------------------------------------------------------------------------------------------------------------------------------------------------------------------------------------------------------------------------------------------------------------------------------------------------|
|  |                        |                     |                                                            | $PM_{10}$ , $R^2 = 60\%$<br>$PM_{coarse}$ , $R^2 = 38\%$<br>$Cu\ PM_{2.5}$ , $R^2 = 81\%$<br>$Cu\ PM_{10}$ , $R^2 = 71\%$<br>$Fe\ PM_{2.5}$ , $R^2 = 73\%$<br>$Fe\ PM_{10}$ , $R^2 = 70\%$<br>$Ni\ PM_{2.5}$ , $R^2 = 72\%$<br>$Ni\ PM_{10}$ , $R^2 = 73\%$<br>$S\ PM_{2.5}$ , $R^2 = 27\%$<br>$S\ PM_{10}$ , $R^2 = 39\%$<br>$V\ PM_{2.5}$ , $R^2 = 63\%$<br>$V\ PM_{10}$ , $R^2 = 67\%$<br>$Zn\ PM_{2.5}$ , $R^2 = 58\%$<br>$Zn\ PM_{10}$ , $R^2 = 67\%$ |
|  | Gehring et al. (2015b) | Residential address | Birth and current year (at the different follow-up visits) | $BC$ , $R^2 = 81\% - 97\%$<br>$NO_2$ , $R^2 = 82\% - 89\%$<br>$PM_{2.5}$ , $R^2 = 67\% - 88\%$<br>$PM_{10}$ , $R^2 = 68\% - 83\%$                                                                                                                                                                                                                                                                                                                          |

|  |                         |                                                                                                                                                             |                                                                                                              |                                                                                                                                                                                                                                                    |
|--|-------------------------|-------------------------------------------------------------------------------------------------------------------------------------------------------------|--------------------------------------------------------------------------------------------------------------|----------------------------------------------------------------------------------------------------------------------------------------------------------------------------------------------------------------------------------------------------|
|  |                         |                                                                                                                                                             |                                                                                                              | PM <sub>coarse</sub> , R <sup>2</sup> = 51%<br>- 81%                                                                                                                                                                                               |
|  | Kerkhof et al. (2010)   | Residential address                                                                                                                                         | Birth year                                                                                                   | BC, R <sup>2</sup> = 81%<br>NO <sub>2</sub> , R <sup>2</sup> = 85%<br>PM <sub>2.5</sub> , R <sup>2</sup> = 73%                                                                                                                                     |
|  | Krämer et al. (2009)    | Residential address<br>( <b>considering moving residence</b> )                                                                                              | Birth year, at 6 y.o.                                                                                        | BC, R <sup>2</sup> = 65%<br>NO <sub>2</sub> , R <sup>2</sup> = 81%                                                                                                                                                                                 |
|  | LeMasters et al. (2015) | Addresses of all locations where the child spent 8 or more hours in an average week from birth to age 7 y.o. (e.g., home, daycare, relative's home, school) | Time-weighted average                                                                                        | EC, R <sup>2</sup> = 74%                                                                                                                                                                                                                           |
|  | MacIntyre et al. (2014) | Residential address                                                                                                                                         | Birth year                                                                                                   | Differs by cohort,<br>all included in this<br>table                                                                                                                                                                                                |
|  | Mölter et al. (2014a)   | The child's home (kitchen, living room, bedroom), the child's school and the journey between home and school                                                | Birth year, birth to review (age 0–3, 0–5, 0–8, 0–11),<br>1 year prior to review (ages 2–3, 4–5, 7–8, 10–11) | BC, R <sup>2</sup> = 91%<br>NO <sub>2</sub> , R <sup>2</sup> = 83%<br>NO <sub>x</sub> , R <sup>2</sup> = 83%<br>PM <sub>2.5</sub> , R <sup>2</sup> = 35%<br>PM <sub>10</sub> , R <sup>2</sup> = 84%<br>PM <sub>coarse</sub> , R <sup>2</sup> = 79% |
|  | Mölter et al. (2014b)   | Residential address                                                                                                                                         | Birth year, age 4 or 5 years and age 8 or 10 years' addresses                                                | NO <sub>2</sub> , R <sup>2</sup> = 67% -<br>87%<br>NO <sub>x</sub> , R <sup>2</sup> = 76% -<br>84%                                                                                                                                                 |

|                      |                           |                                                                                                   |                                                                                                                                                                   |                                                                                        |
|----------------------|---------------------------|---------------------------------------------------------------------------------------------------|-------------------------------------------------------------------------------------------------------------------------------------------------------------------|----------------------------------------------------------------------------------------|
|                      | Morgenstern et al. (2007) | Residential address                                                                               | Birth year                                                                                                                                                        | BC, $R^2 = 47\%$<br>NO <sub>2</sub> , $R^2 = 51\%$<br>PM <sub>2.5</sub> , $R^2 = 36\%$ |
|                      | Morgenstern et al. (2008) | Residential address<br>( <b>considering moving residence</b> )                                    | Birth year and at 2 or 3 y.o. and at 6 y.o.                                                                                                                       | BC, $R^2 = 42\%$<br>NO <sub>2</sub> , $R^2 = 51\%$<br>PM <sub>2.5</sub> , $R^2 = 36\%$ |
|                      | Ranzi et al. (2014)       | Residential address<br>( <b>considering moving residence</b> )                                    | Birth year, current exposure (calculated at residence 6 months before the date of interview), time-weighted average (from birth to 6 months before the interview) | NO <sub>2</sub> , $R^2 = 70\%$                                                         |
|                      | Tétreault et al. (2016)   | Residential address<br>( <b>considering moving residence</b> )                                    | Birth year, time-varying annual exposures                                                                                                                         | NO <sub>2</sub> , $R^2 = 80\%$                                                         |
|                      | Yang et al. (2016)        | Residential address                                                                               | Birth year, current year                                                                                                                                          | BC, $R^2 = 92\%$<br>NO <sub>2</sub> , $R^2 = 86\%$<br>PM <sub>2.5</sub> , $R^2 = 67\%$ |
| Dispersion modelling | Gruzieva et al. (2013)    | Residential, daycare, and school addresses<br>( <b>unclear if they considered moving houses</b> ) | Birth year, current exposure (12 months before the date of a questionnaire), average exposure during since the previous follow-up                                 | NO <sub>x</sub> , $R^2 = 74\% - 80\%$<br>PM <sub>10</sub> , $R^2 = 61\%$               |
|                      | Hasunuma et al. (2016)    | Residential and nursery address<br>( <b>considering moving residence</b> )                        | Time-weighted average during the first 1.5 years of life                                                                                                          | EC, $R^2 = 59\% - 67\%$<br>NO <sub>x</sub> , $R^2 = 76\% - 88\%$                       |

|                                             |                                             |                                                                                                                    |                                                                                              |                                                                                |
|---------------------------------------------|---------------------------------------------|--------------------------------------------------------------------------------------------------------------------|----------------------------------------------------------------------------------------------|--------------------------------------------------------------------------------|
|                                             | Lindgren et al. (2013)                      | Residential address<br><b>(considering moving residence)</b>                                                       | Birth year, lifetime mean (2005-2010)                                                        | NO <sub>x</sub> , R <sub>s</sub> = 80%                                         |
|                                             | MacIntyre et al. (2014) – BAMSE cohort only | Residential address at birth                                                                                       | Birth year                                                                                   | NO <sub>x</sub> , r <sup>2</sup> = 0.93                                        |
|                                             | McConnell et al. (2010)                     | Residential and school addresses<br><b>(sensitivity analysis restricted to lifetime residents at same address)</b> | 1997 (little change from 1997 over the lifetime of these children prior to study enrollment) | NO <sub>2</sub> , R <sup>2</sup> = 34% - 56%                                   |
|                                             | Oftedal et al. (2009)                       | Residential address<br><b>(considering moving residence)</b>                                                       | Birth year, cumulatively before onset                                                        | NO <sub>2</sub> , r = 76%                                                      |
|                                             | Rancière et al. (2016)                      | Residential and daycare address<br><b>(considering moving residence)</b>                                           | Birth year                                                                                   | NO <sub>x</sub> , r = 0.89                                                     |
|                                             | Yamazaki et al. (2014)                      | Residential and school addresses                                                                                   | Two years mean before asthma development                                                     | EC, R <sup>2</sup> = 59% - 67%<br>NO <sub>x</sub> , R <sup>2</sup> = 76% - 88% |
| Residential measurements (NO <sub>2</sub> ) | Jerrett et al. (2008)                       | Residential address                                                                                                | Annual/ fall-winter/ summer 2 weeks' average concentrations in 2000                          | No validation                                                                  |



|                                     |                         |                                             |                                           |               |
|-------------------------------------|-------------------------|---------------------------------------------|-------------------------------------------|---------------|
| Remote sensing (PM <sub>2.5</sub> ) | Tétreault et al. (2016) | Post code<br>(considering moving residence) | Birth year, time-varying annual exposures | No validation |
|-------------------------------------|-------------------------|---------------------------------------------|-------------------------------------------|---------------|

## References

- BRAUER, M., HOEK, G., SMIT, H., DE JONGSTE, J., GERRITSEN, J., POSTMA, D. S., KERKHOF, M. & BRUNEKREEF, B. 2007. Air pollution and development of asthma, allergy and infections in a birth cohort. *European Respiratory Journal*, 29, 879-888.
- BRAUER, M., HOEK, G., VAN VLIET, P., MELIEFSTE, K., FISCHER, P. H., WIJGA, A., KOOPMAN, L. P., NEIJENS, H. J., GERRITSEN, J. & KERKHOF, M. 2002. Air pollution from traffic and the development of respiratory infections and asthmatic and allergic symptoms in children. *American journal of respiratory and critical care medicine*, 166, 1092-1098.
- BRUNST, K. J., RYAN, P. H., BROKAMP, C., BERNSTEIN, D., REPONEN, T., LOCKEY, J., KHURANA HERSHEY, G. K., LEVIN, L., GRINSHUPUN, S. A. & LEMASTERS, G. 2015. Timing and duration of traffic-related air pollution exposure and the risk for childhood wheeze and asthma. *American journal of respiratory and critical care medicine*, 192, 421-427.
- CARLSTEN, C., DYBUNCIO, A., BECKER, A., CHAN-YEUNG, M. & BRAUER, M. 2010. Traffic-related air pollution and incident asthma in a high-risk birth cohort. *Occupational and environmental medicine*, oem-2010.
- CLARK, N. A., DEMERS, P. A., KARR, C. J., KOEHOORN, M., LENCAR, C., TAMBURIC, L. & BRAUER, M. 2010. Effect of early life exposure to air pollution on development of childhood asthma. *Environmental Health Perspectives*, 118, 284.
- DELL, S. D., JERRETT, M., BECKERMAN, B., BROOK, J. R., FOTY, R. G., GILBERT, N. L., MARSHALL, L., MILLER, J. D., TO, T. & WALTER, S. D. 2014. Presence of other allergic disease modifies the effect of early childhood traffic-related air pollution exposure on asthma prevalence. *Environment International*, 65, 83-92.
- DENG, Q., LU, C., NORBÄCK, D., BORNEHAG, C.-G., ZHANG, Y., LIU, W., YUAN, H. & SUNDELL, J. 2015. Early life exposure to ambient air pollution and childhood asthma in China. *Environmental research*, 143, 83-92.
- DENG, Q., LU, C., OU, C., CHEN, L. & YUAN, H. 2016. Preconceptional, prenatal and postnatal exposure to outdoor and indoor environmental factors on allergic diseases/symptoms in preschool children. *Chemosphere*, 152, 459-467.
- ENGLISH, P., NEUTRA, R., SCALF, R., SULLIVAN, M., WALLER, L. & ZHU, L. 1999. Examining associations between childhood asthma and traffic flow using a geographic information system. *Environmental Health Perspectives*, 107, 761.

- FUERTES, E., STANDL, M., CYRYS, J., BERDEL, D., VON BERG, A., BAUER, C.-P., KRÄMER, U., SUGIRI, D., LEHMANN, I. & KOLETZKO, S. 2013. A longitudinal analysis of associations between traffic-related air pollution with asthma, allergies and sensitization in the GINIplus and LISAplus birth cohorts. *PeerJ*, 1, e193.
- GEHRING, U., BELEN, R., EEFSENS, M., HOEK, G., DE HOOGH, K., DE JONGSTE, J. C., KEUKEN, M., KOPPELMAN, G. H., MELIEFSTE, K. & OLDENWENING, M. 2015a. Particulate matter composition and respiratory health: the PIAMA Birth Cohort Study. *Epidemiology*, 26, 300-309.
- GEHRING, U., CYRYS, J., SEDLMEIR, G., BRUNEKREEF, B., BELLANDER, T., FISCHER, P., BAUER, C., REINHARDT, D., WICHMANN, H. & HEINRICH, J. 2002. Traffic-related air pollution and respiratory health during the first 2 yrs of life. *European Respiratory Journal*, 19, 690-698.
- GEHRING, U., WIJGA, A. H., BRAUER, M., FISCHER, P., DE JONGSTE, J. C., KERKHOF, M., OLDENWENING, M., SMIT, H. A. & BRUNEKREEF, B. 2010. Traffic-related air pollution and the development of asthma and allergies during the first 8 years of life. *American Journal of Respiratory and Critical Care Medicine*, 181, 596-603.
- GEHRING, U., WIJGA, A. H., HOEK, G., BELLANDER, T., BERDEL, D., BRÜSKE, I., FUERTES, E., GRUZIEVA, O., HEINRICH, J. & HOFFMANN, B. 2015b. Exposure to air pollution and development of asthma and rhinoconjunctivitis throughout childhood and adolescence: a population-based birth cohort study. *The Lancet Respiratory Medicine*, 3, 933-942.
- GRUZIEVA, O., BERGSTRÖM, A., HULCHY, O., KULL, I., LIND, T., MELÉN, E., MOSKALENKO, V., PERSHAGEN, G. & BELLANDER, T. 2013. Exposure to air pollution from traffic and childhood asthma until 12 years of age. *Epidemiology*, 24, 54-61.
- HASUNUMA, H., SATO, T., IWATA, T., KOHNO, Y., NITTA, H., ODAJIMA, H., OHARA, T., OMORI, T., ONO, M. & YAMAZAKI, S. 2016. Association between traffic-related air pollution and asthma in preschool children in a national Japanese nested case-control study. *BMJ open*, 6, e010410.
- JERRETT, M., SHANKARDASS, K., BERHANE, K., GAUDERMAN, W. J., KÜNZLI, N., AVOL, E., GILLILAND, F., LURMANN, F., MOLITOR, J. N. & MOLITOR, J. T. 2008. Traffic-related air pollution and asthma onset in children: a prospective cohort study with individual exposure measurement. *Environmental Health Perspectives*, 116, 1433-1438.
- KERKHOF, M., POSTMA, D., BRUNEKREEF, B., REIJMERINK, N., WIJGA, A., DE JONGSTE, J., GEHRING, U. & KOPPELMAN, G. 2010. Toll-like receptor 2 and 4 genes influence susceptibility to adverse effects of traffic-related air pollution on childhood asthma. *Thorax*, 65, 690-697.
- KIM, J., HAN, Y., SEO, S. C., LEE, J. Y., CHOI, J., KIM, K. H., WOO, S.-Y., KIM, E.-H., KWON, H.-J. & CHEONG, H. K. Association of carbon monoxide levels with allergic diseases in children. *Allergy and Asthma Proceedings*, 2016. OceanSide Publications, Inc, e1-e7.
- KRÄMER, U., SUGIRI, D., RANFT, U., KRUTMANN, J., VON BERG, A., BERDEL, D., BEHRENDT, H., KUHLBUSCH, T., HOCHADEL, M. & WICHMANN, H.-E. 2009. Eczema, respiratory allergies, and traffic-related air pollution in birth cohorts from small-town areas. *Journal of Dermatological Science*, 56, 99-105.
- LEMASTERS, G., LEVIN, L., BERNSTEIN, D. I., LOCKEY, S. D., LOCKEY, J. E., BURKLE, J., KHURANA HERSHEY, G. K., BRUNST, K. & RYAN, P. H. 2015. Secondhand smoke and traffic exhaust confer opposing risks for asthma in normal and overweight children. *Obesity*, 23, 32-36.
- LINDGREN, A., STROH, E., BJÖRK, J. & JAKOBSSON, K. 2013. Asthma incidence in children growing up close to traffic: a registry-based birth cohort. *Environmental Health*, 12, 91.
- LIU, W., HUANG, C., HU, Y., FU, Q., ZOU, Z., SUN, C., SHEN, L., WANG, X., CAI, J. & PAN, J. 2016. Associations of gestational and early life exposures to ambient air pollution with childhood respiratory diseases in Shanghai, China: A retrospective cohort study. *Environment international*, 92, 284-293.

- MACINTYRE, E. A., BRAUER, M., MELÉN, E., BAUER, C. P., BAUER, M., BERDEL, D., BERGSTRÖM, A., BRUNEKREEF, B., CHAN-YEUNG, M., KLÜMPER, C., FUERTES, E., GEHRING, U., GREF, A., HEINRICH, J., HERBARTH, O., KERKHOF, M., KOPPELMAN, G. H., KOZYRSKYJ, A. L., PERSHAGEN, G., POSTMA, D. S., THIERING, E., TIESLER, C. M. T., CARLSTEN, C. & GROUP, T. S. 2014. GSTP1 and TNF gene variants and associations between air pollution and incident childhood asthma: the traffic, asthma and genetics (TAG) study. *Environmental health perspectives*, 122, 418-424.
- MCCONNELL, R., ISLAM, T., SHANKARDASS, K., JERRETT, M., LURMANN, F., GILLILAND, F. & GAUDERMAN, J. 2010. Childhood incident asthma and traffic-related air pollution at home and school. *Environmental Health Perspectives*, 118, 1021.
- MÖLTER, A., AGIUS, R., DE VOCHT, F., LINDLEY, S., GERRARD, W., CUSTOVIC, A. & SIMPSON, A. 2014a. Effects of long-term exposure to PM10 and NO2 on asthma and wheeze in a prospective birth cohort. *Journal of epidemiology and community health*, 68, 21-28.
- MÖLTER, A., SIMPSON, A., BERDEL, D., BRUNEKREEF, B., CUSTOVIC, A., CYRYS, J., DE JONGSTE, J., DE VOCHT, F., FUERTES, E. & GEHRING, U. 2014b. A multicentre study of air pollution exposure and childhood asthma prevalence: the ESCAPE project. *European Respiratory Journal*, erj00836-2014.
- MORGENSTERN, V., ZUTAVERN, A., CYRYS, J., BROCKOW, I., GEHRING, U., KOLETZKO, S., BAUER, C.-P., REINHARDT, D., WICHMANN, H.-E. & HEINRICH, J. 2007. Respiratory health and individual estimated exposure to traffic-related air pollutants in a cohort of young children. *Occupational and environmental medicine*, 64, 8-16.
- MORGENSTERN, V., ZUTAVERN, A., CYRYS, J., BROCKOW, I., KOLETZKO, S., KRAMER, U., BEHRENDT, H., HERBARTH, O., VON BERG, A. & BAUER, C. P. 2008. Atopic diseases, allergic sensitization, and exposure to traffic-related air pollution in children. *American Journal of Respiratory and Critical Care Medicine*, 177, 1331-1337.
- OFTEDAL, B., NYSTAD, W., BRUNEKREEF, B. & NAFSTAD, P. 2009. Long-term traffic-related exposures and asthma onset in schoolchildren in Oslo, Norway. *Environmental Health Perspectives*, 117, 839-844.
- PATEL, M. M., QUINN, J. W., JUNG, K. H., HOEPNER, L., DIAZ, D., PERZANOWSKI, M., RUNDLE, A., KINNEY, P. L., PERERA, F. P. & MILLER, R. L. 2011. Traffic density and stationary sources of air pollution associated with wheeze, asthma, and immunoglobulin E from birth to age 5 years among New York City children. *Environmental Research*, 111, 1222-1229.
- RANCIÈRE, F., BOUGAS, N., VIOLA, M. & MOMAS, I. 2016. Early exposure to traffic-related air pollution, respiratory symptoms at 4 years of age, and potential effect modification by parental allergy, stressful family events, and gender: A prospective follow-up study of the PARIS birth cohort. *Environmental health perspectives*.
- RANZI, A., PORTA, D., BADALONI, C., CESARONI, G., LAURIOLA, P., DAVOLI, M. & FORASTIERE, F. 2014. Exposure to air pollution and respiratory symptoms during the first 7 years of life in an Italian birth cohort. *Occupational and Environmental Medicine*, oemed-2013-101867.
- SHIMA, M. & ADACHI, M. 2000. Effect of outdoor and indoor nitrogen dioxide on respiratory symptoms in schoolchildren. *International Journal of Epidemiology*, 29, 862-870.
- SHIMA, M., NITTA, Y. & ADACHI, M. 2003. Traffic-related air pollution and respiratory symptoms in children living along trunk roads in Chiba Prefecture, Japan. *Journal of Epidemiology*, 13, 108-119.
- SHIMA, M., NITTA, Y., ANDO, M. & ADACHI, M. 2002. Effects of air pollution on the prevalence and incidence of asthma in children. *Archives of Environmental Health: An International Journal*, 57, 529-535.

- TÉTREAU, L.-F., DOUCET, M., GAMACHE, P., FOURNIER, M., BRAND, A., KOSATSKY, T. & SMARGIASSI, A. 2016. Childhood Exposure to Ambient Air Pollutants and the Onset of Asthma: An Administrative Cohort Study in Québec. *Environmental Health Perspectives*.
- WANG, I.-J., TUNG, T.-H., TANG, C.-S. & ZHAO, Z.-H. 2016. Allergens, air pollutants, and childhood allergic diseases. *International Journal of Hygiene and Environmental Health*, 219, 66-71.
- YAMAZAKI, S., SHIMA, M., NAKADATE, T., OHARA, T., OMORI, T., ONO, M., SATO, T. & NITTA, H. 2014. Association between traffic-related air pollution and development of asthma in school children: cohort study in Japan. *Journal of Exposure Science and Environmental Epidemiology*, 24, 372-379.
- YANG, A., JANSSEN, N. A., BRUNEKREEF, B., CASSEE, F. R., HOEK, G. & GEHRING, U. 2016. Children's respiratory health and oxidative potential of PM<sub>2.5</sub>: the PIAMA birth cohort study. *Occupational and environmental medicine*, oemed-2015-103175.
- ZMIROU, D., GAUVIN, S., PIN, I., MOMAS, I., SAHRAOUI, F., JUST, J., LE MOULLEC, Y., BREMONT, F., CASSADOU, S. & REUNGOAT, P. 2004. Traffic related air pollution and incidence of childhood asthma: results of the Vesta case-control study. *Journal of Epidemiology and Community Health*, 58, 18-23.
